# Supplementary material for: Persistent mRNA localization defects and cell death in ALS neurons caused by transient cellular stress
Source: PubMed Central journal article supplement — Cell Rep. Author manuscript; Available in PMC 2024 Aug 22. (PMC11341010; doi:10.1016/j.celrep.2021.109685), 2021-09-07
Supplement: NIHMS2006451-supplement-1.pdf [file NIHMS2006451-supplement-1.pdf]

**Cell Reports, Volume 36**

**Supplemental information**

**Persistent mRNA localization defects  
and cell death in ALS neurons caused  
by transient cellular stress**

**Sebastian Markmiller, Shashank Sathe, Kari L. Server, Thai B. Nguyen, Amit Fulzele, Neal Cody, Ashkan Javaherian, Sara Broski, Steven Finkbeiner, Eric J. Bennett, Eric Lécuyer, and Gene W. Yeo**

**Figure S1**

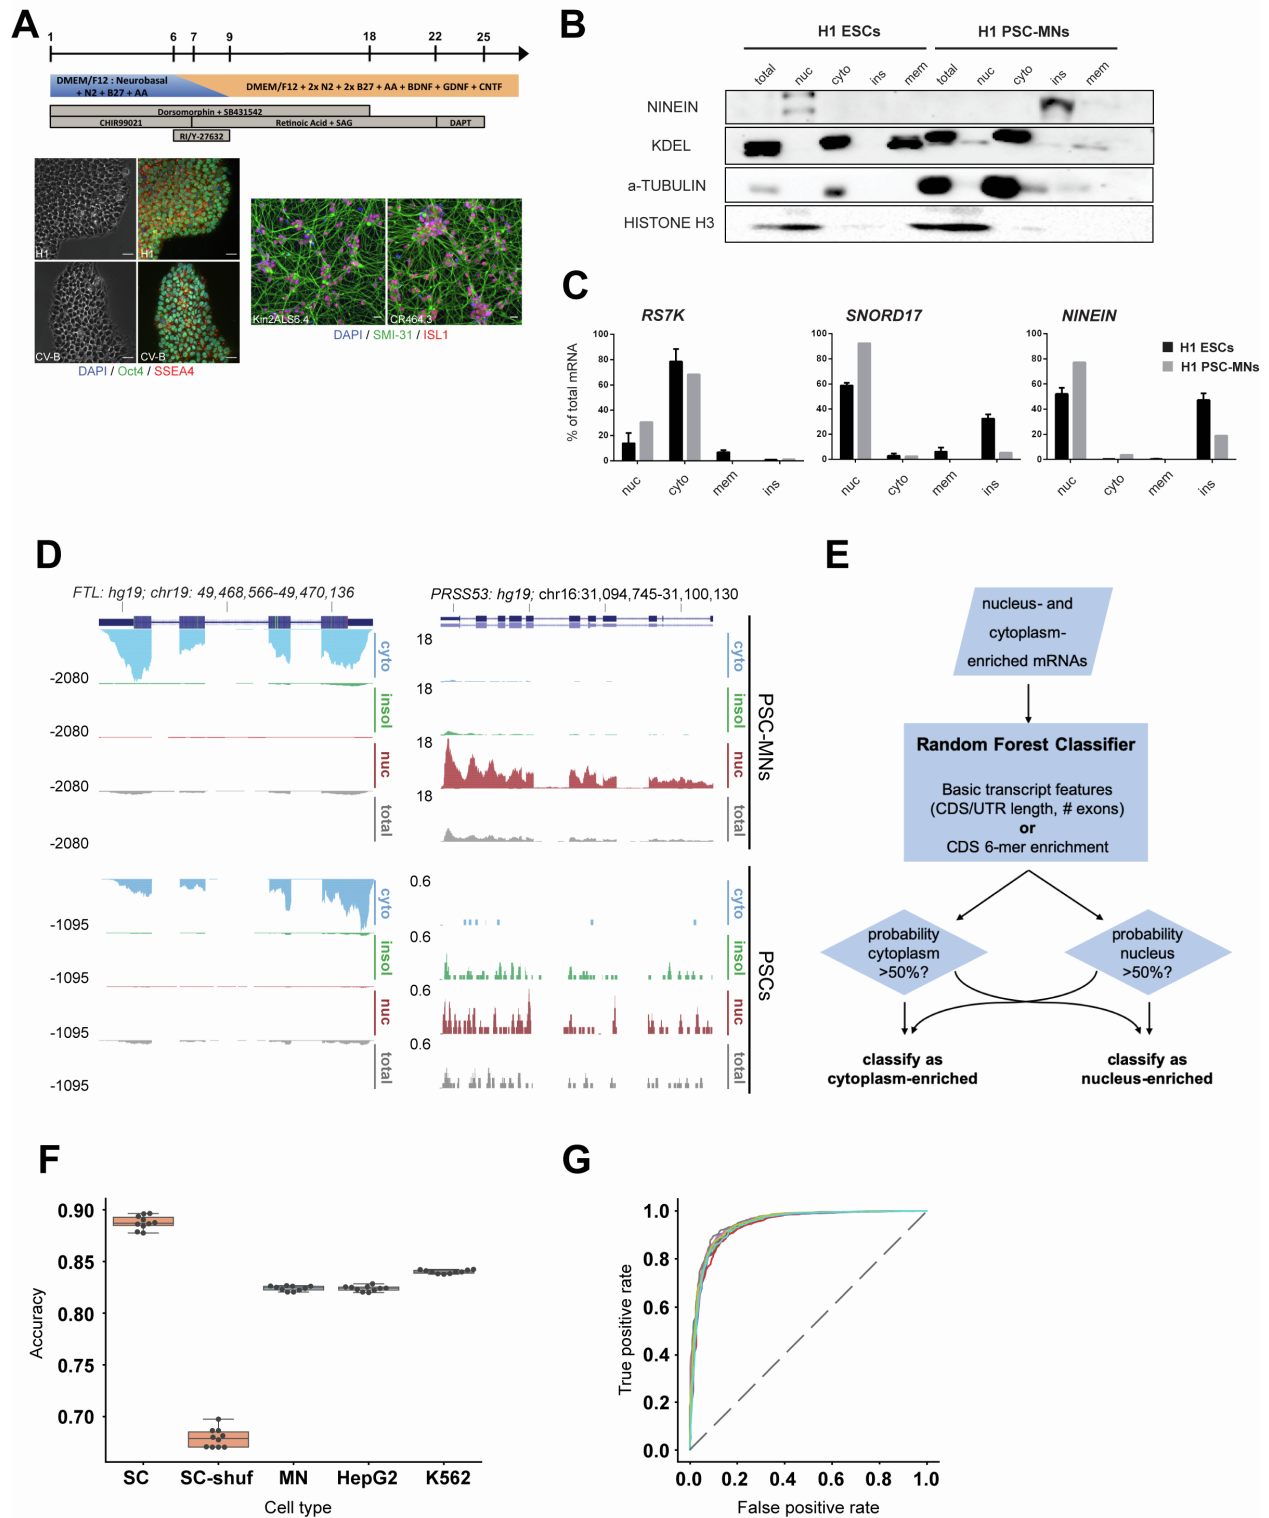

**Figure S1. CeFRa-seq applied to PSC-derived motor neurons, related to Figure 1**

(A) Schematic of motor neuron differentiation protocol and immunofluorescence staining of induced pluripotent stem cells (CV-B), embryonic stem cells (H1), and pluripotent stem cell-derived motor neurons (PSC-MNs) (Kin2ALS6, CR463.4). Pluripotent stem cells (PSCs) were stained with antibodies against Oct4 and SSEA4, PSC-MNs were stained with antibodies against phosphorylated neurofilament (SMI-31) and Islet1. Nuclei were stained using DAPI. Scale bars = 20  $\mu\text{m}$  in all panels. (B) Western blot analysis of known fraction-enriched proteins in PSCs and PSC-MNs. (C) qRT-PCR analysis of known fraction-enriched transcripts in PSCs and PSC-MNs. (D) Genome browser tracks showing CeFra-seq read coverage for two sample transcripts, *FTL* (left) and *PRSS53* (right). (E) Schematic showing classification algorithm to predict transcripts with nuclear vs cytoplasmic enrichment. (F) Box plots showing accuracy of random forest classifier in correctly predicting nuclear vs. cytoplasmic localization across several cell lines. (G) Area under the curve for 10 iterations of the random forest classifier in predicting nuclear or cytoplasm-enriched transcripts in PSCs.

## Figure S2

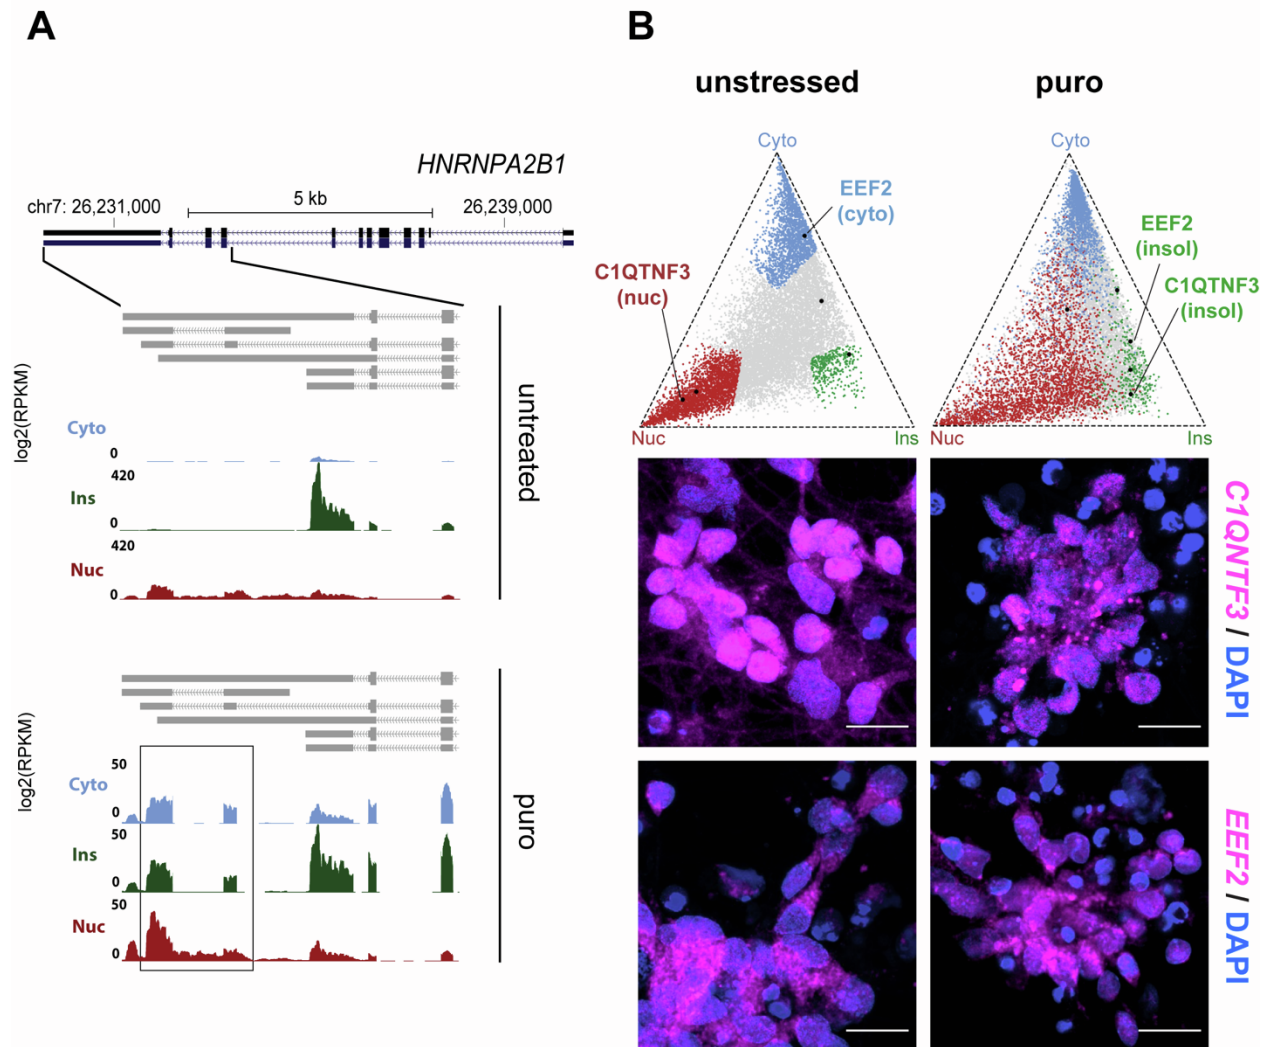

**Figure S2. Stress-induced RNA localization changes in PSC-MNs, related to Figure 2**

(A) Genome browser tracks showing CeFra-seq read coverage for *HNRNPA2B1* in unstressed and puromycin-stressed PSC-MNs. (B) RNA FISH staining of PSC-MNs that were either left untreated or treated with puromycin (10  $\mu\text{g/ml}$ ) for 24h. Cells were stained with Stellaris probes against *C1QTNF3* or *EE2*, respectively. Scale bars = 20  $\mu\text{m}$  in all panels. Nuclei were stained using DAPI.

Figure S3

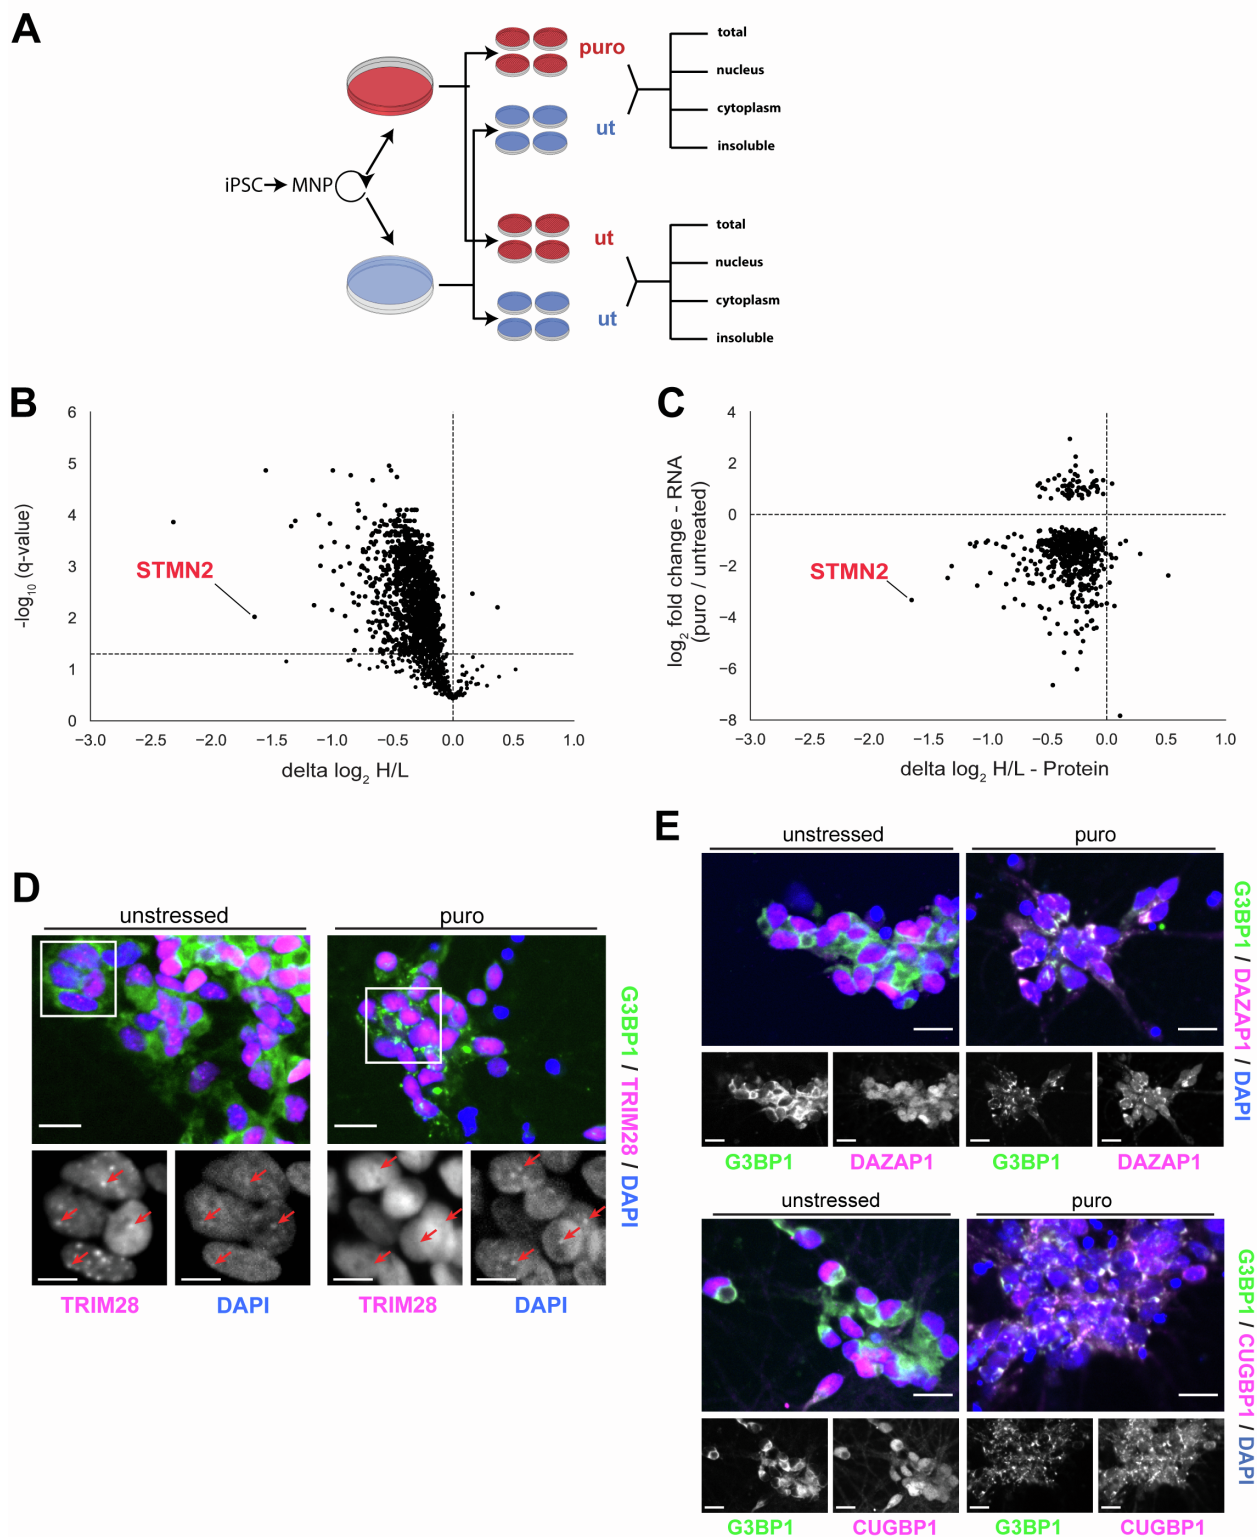

**Figure S3. Stress-induced protein localization changes in PSC-MNs, related to Figure 2**

(A) Schematic showing experimental design for SILAC quantitative mass spectrometry analysis of fraction-enriched proteins. (B) Volcano plot showing changes in total protein levels for all detected proteins in response to puromycin stress. (C) Scatterplot showing  $\log_2$  fold changes at the RNA and protein level for all detected transcripts/proteins in response to puromycin stress. (D) Immunofluorescence staining of PSC-MNs that were either left untreated or treated with puromycin (10 $\mu$ g/ml) for 24h. Cells were stained with antibodies against G3BP1 and DAZAP1 or CUGBP1, respectively. Nuclei were stained using DAPI. Scale bars = 20  $\mu$ m in top panels, 10 $\mu$ m in bottom panels. (E) Immunofluorescence staining of PSC-MNs that were either left untreated or treated with puromycin (10 $\mu$ g/ml) for 24h. Cells were stained with antibodies against G3BP1 and TRIM28. Heterochromatin foci are indicated by solid yellow arrowheads. Nuclei were stained using DAPI. Scale bars = 20  $\mu$ m in top panels, 10 $\mu$ m in magnified insert panels.

**Figure S4**

**A**

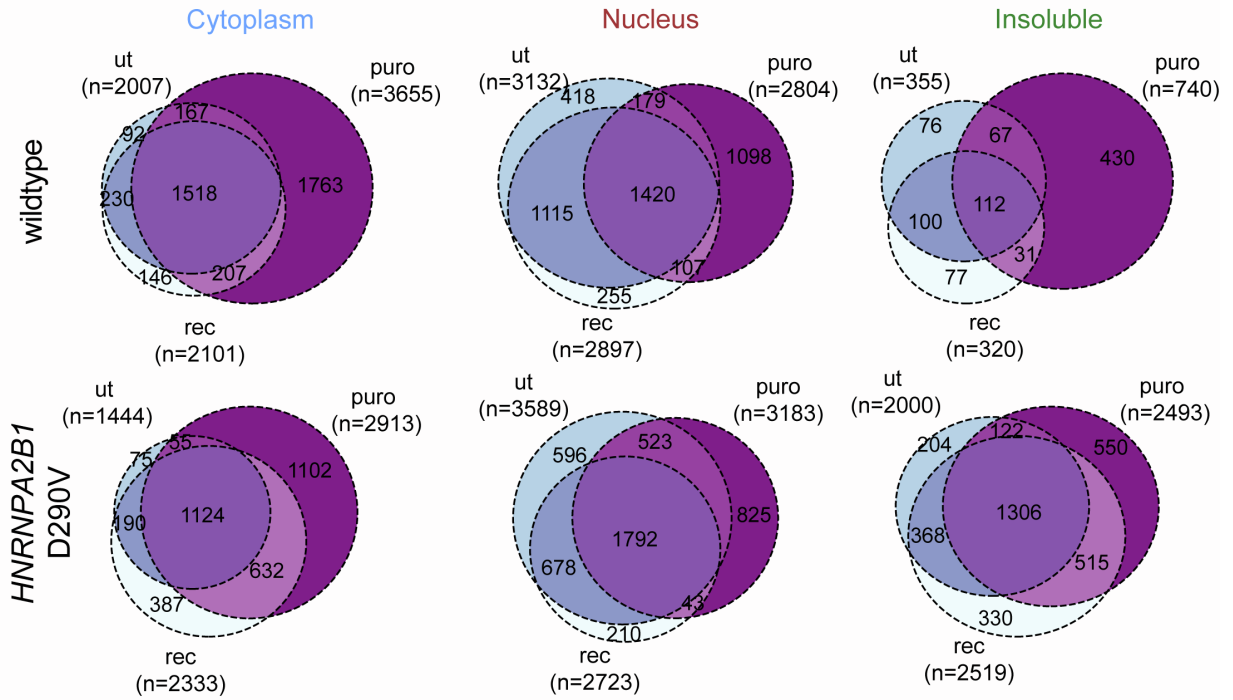

**B**

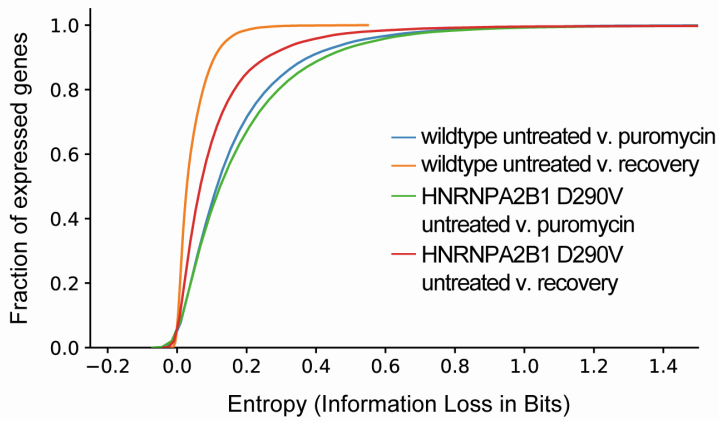

**Figure S4, Persistent stress-induced localization changes in ALS neurons, related to Figure 4**

(A) Venn diagrams showing overlap between sets of fraction-enriched transcripts in unstressed (left), puromycin-stressed (center) and recovery (right) conditions in wildtype (top) PSC-MNs and PSC-MNs harboring a mutation in *HNRNPA2B1* (bottom). (B) Cumulative distribution plots showing relative entropies for all detected transcripts in the indicated comparisons between two conditions.
